# Supplementary material for: A highly sensitive immunofluorescence sensor based on bicolor upconversion and magnetic separation for simultaneous detection of fumonisin B1 and zearalenone
Source: Royal Society of Chemistry journal article supplement (doi:10.1039/d1an00004g), 2021-01-01
Supplement: d1an00004g1.pdf [file d1an00004g1.pdf]

## SUPPLEMENTARY INFORMATION

### **A highly sensitive immunofluorescence sensor based on bicolor upconversion and magnetic separation for simultaneous detection of fumonisin B1 and zearalenone**

Jingzhi Li,<sup>a,b,†</sup> Xudong Zhao,<sup>b,†</sup> Yu Wang,<sup>b</sup> Shuang Li,<sup>b</sup> Yingkai Qin,<sup>b</sup> Tie Han,<sup>\*b</sup> Zhixian Gao,<sup>\*b</sup>  
and Hui Liu<sup>\*a</sup>

<sup>a</sup> School of Public Health, Lanzhou University, Lanzhou 730000, P.R. China.

<sup>b</sup> Tianjin Institute of Environmental and Operational Medicine, Tianjin 300050, P.R. China.

## SUPPLEMENTARY FIGURES

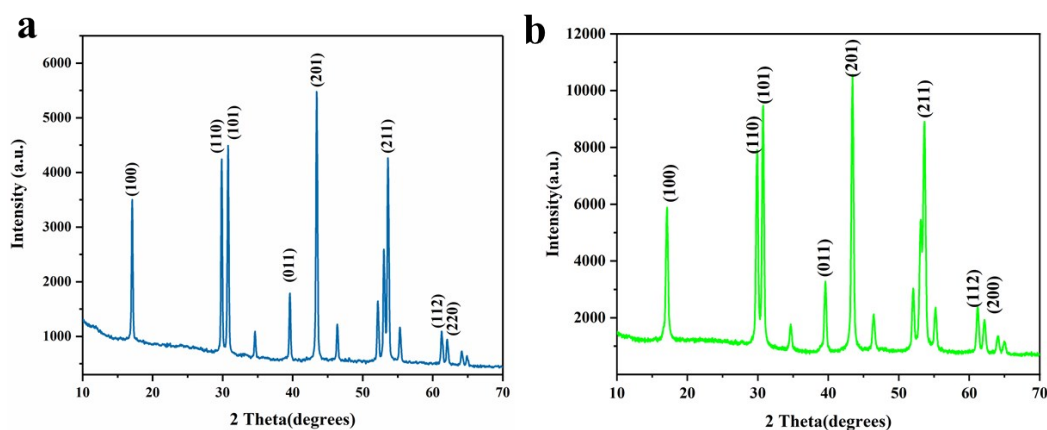

**Figure S1** XRD patterns of NaYF<sub>4</sub> UCNPs: PEI-NaYF<sub>4</sub>:Yb<sup>3+</sup>,Tm<sup>3+</sup> UCNPs(a), PEI-NaYF<sub>4</sub>:Yb<sup>3+</sup>,Er<sup>3+</sup> UCNPs(b)

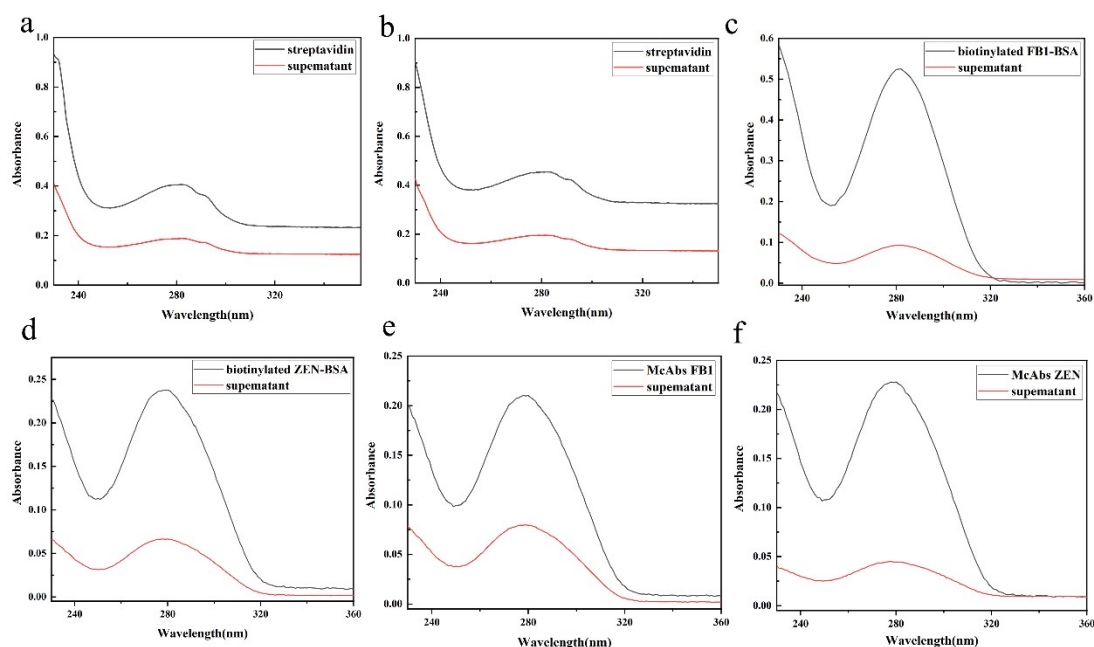

**Figure S2** Characterization of fluorescence signal probes and capture probes. UV-vis absorption spectra of streptavidin stock solution and the supernatant solution after incubated (a,b), UV-vis absorption spectra of biotinylated FB<sub>1</sub>-BSA and biotinylated ZEN-BSA stock solution and the supernatant solution after incubated (c,d), UV-vis absorption spectra of McAbs FB<sub>1</sub> and McAbs ZEN and the supernatant solution after incubated (e,f).

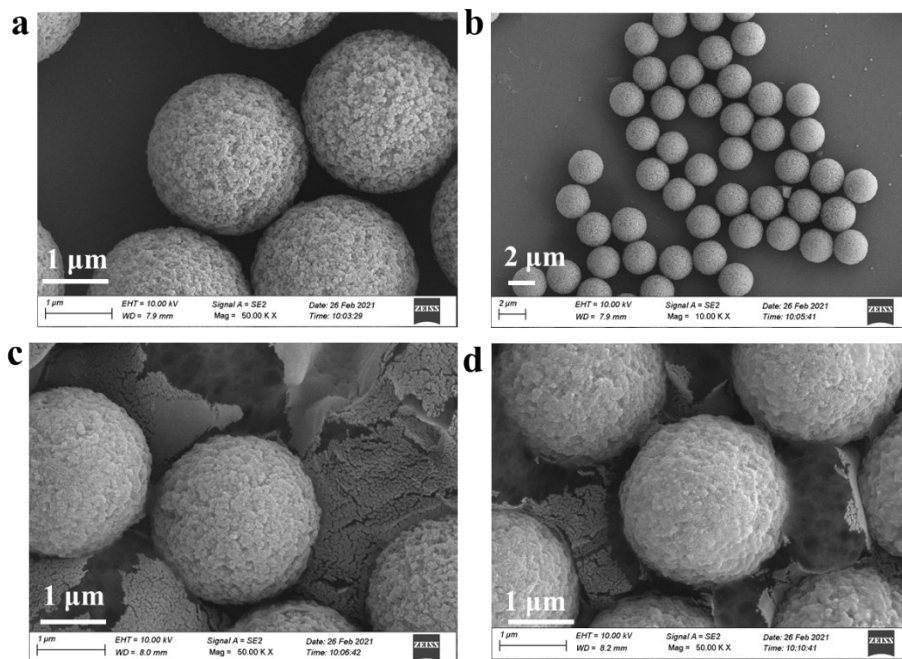

**Figure S3** Characterization of capture probes. SEM of magnetic nanoparticles(a,b); SEM of McAbs FB1 and McAbs ZEN after incubated (c,d).

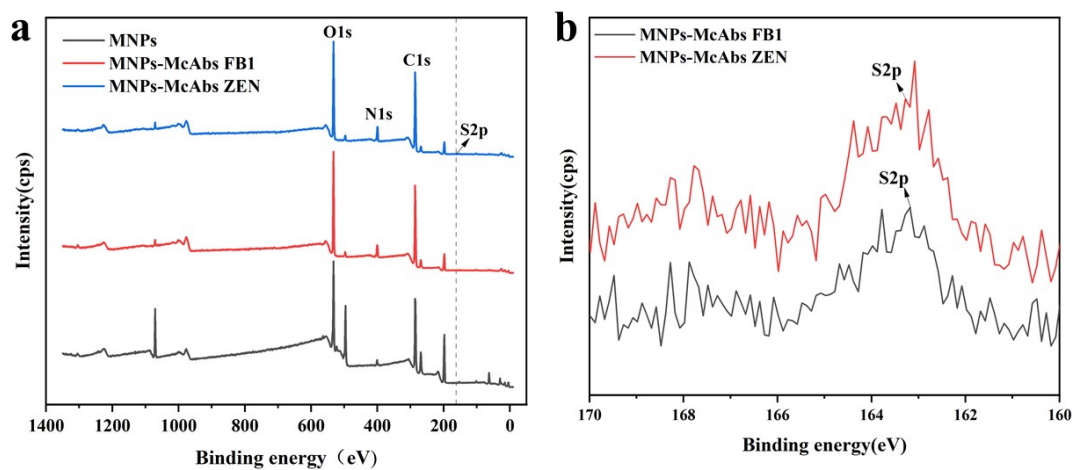

**Figure S4** Characterization of capture probes. XPS of magnetic nanoparticles ,MNPs-McAbs FB1 and MNPs-McAbs ZEN.

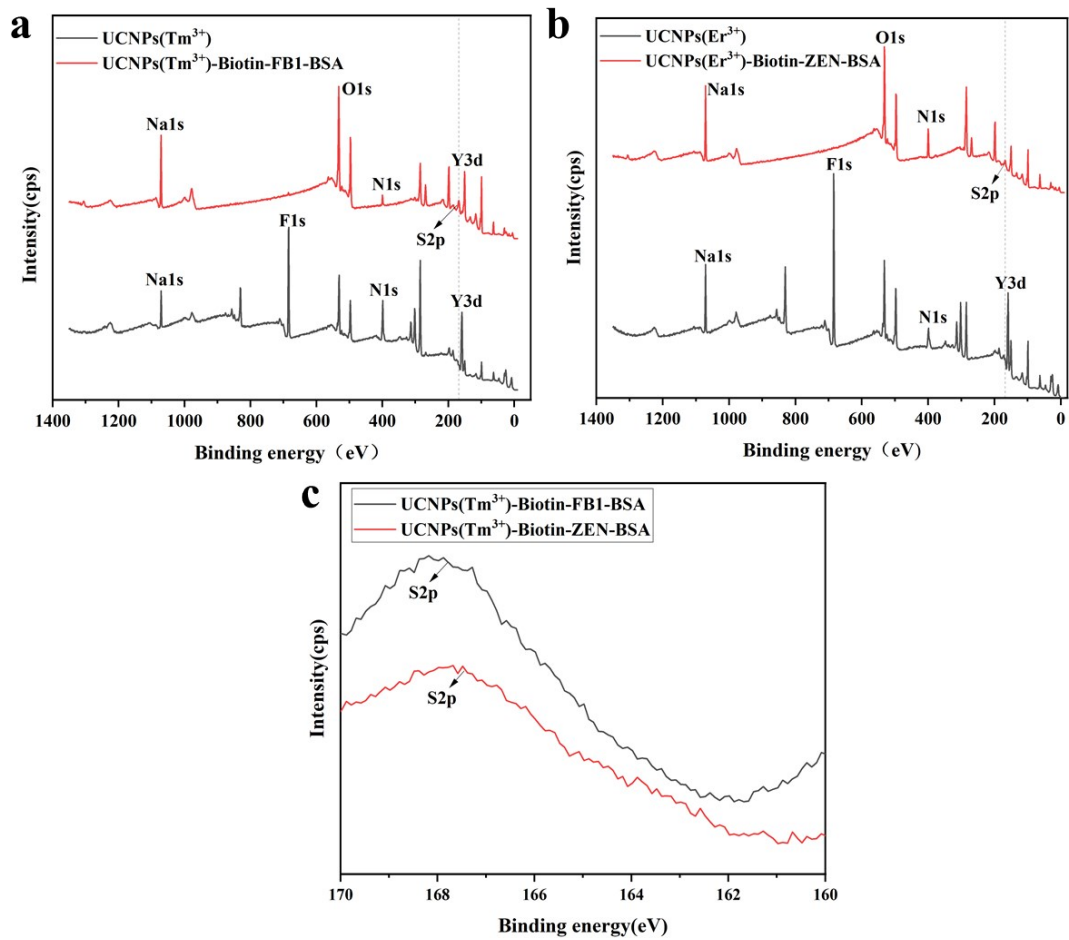

**Figure S5** Characterization of upconversion fluorescent probes. XPS spectra of UCNPs,UCNPs-Biotin-FB1-BSA and UCNPs-Biotin-ZEN-BSA.

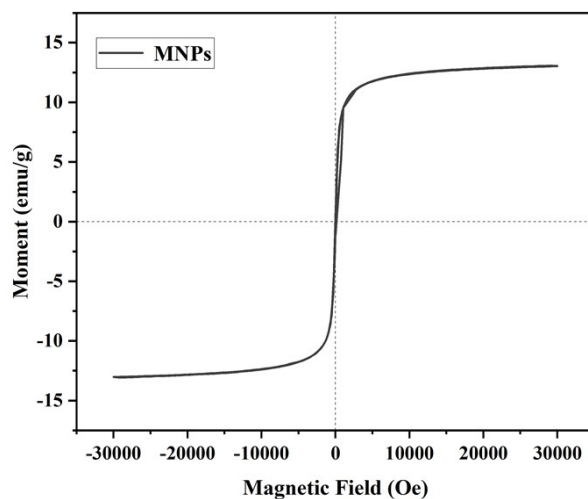

**Figure S6** VSM spectra of magnetic nanoparticles.
